# 1            Phased genome sequence of an interspecific hybrid

## 2            flowering cherry, Somei-Yoshino (*Cerasus* × *yedoensis*)

3  
4    Kenta Shirasawa<sup>1\*</sup>, Tomoya Esumi<sup>2</sup>, Hideki Hirakawa<sup>1</sup>, Hideyuki Tanaka<sup>2</sup>, Akihiro Itai<sup>3</sup>,  
5    Andrea Ghelfi<sup>1</sup>, Hideki Nagasaki<sup>1</sup>, Sachiko Isobe<sup>1</sup>

6  
7    <sup>1</sup>Kazusa DNA Research Institute, Japan, <sup>2</sup>Shimane University, Japan, and <sup>3</sup>Kyoto Prefectural  
8    University, Japan

9  
10   \*Correspondence:

11   Kenta Shirasawa

12   [shirasaw@kazusa.or.jp](mailto:shirasaw@kazusa.or.jp)

### 13 14   **Abstract**

15   We report the phased genome sequence of an interspecific hybrid, the flowering cherry  
16   Somei-Yoshino (*Cerasus* × *yedoensis*). The sequence was determined by single-molecule  
17   real-time sequencing technology and assembled using a trio-binning strategy in which allelic  
18   variation was resolved to obtain phased sequences. The resultant assembly consisting of two  
19   haplotype genomes spanned 690.1 Mb with 4,552 contigs and an N50 length of 1.0 Mb. We  
20   predicted 95,076 high-confidence genes, including 94.9% of the core eukaryotic genes. Based  
21   on a high-density genetic map, we established a pair of eight pseudomolecule sequences, with  
22   highly conserved structures between two genome sequences with 2.4 million sequence  
23   variants. A whole genome resequencing analysis of flowering cherry varieties suggested that  
24   Somei-Yoshino is derived from a cross between *C. spachiana* and either *C. speciose* or its  
25   derivative. Transcriptome data for flowering date revealed comprehensive changes in gene  
26   expression in floral bud development toward flowering. These genome and transcriptome  
27   data are expected to provide insights into the evolution and cultivation of flowering cherry  
28   and the molecular mechanism underlying flowering.

29  
30   **Keywords:** floral bud, flowering cherry; interspecific hybrid; phased genome sequence;  
31   transcriptome

1

## 2 **Introduction**

3 Flowering cherry, called sakura, is Japan's unofficial national flower and is a popular  
4 ornamental tree in Japan and elsewhere. Cherry blossoms are symbols of spring, when  
5 blooming typically occurs. Accordingly, flowering cherries are important resources for the  
6 tourism industry in the spring season in Japan. More than 200 varieties of flowering cherry  
7 are grown (Kato et al. 2012). The nomenclature and, in particular, the genus name (*Prunus*  
8 or *Cerasus*) has been under discussion. We use the genus name *Cerasus* in accordance with  
9 recent molecular and population genetic analyses (Katsuki and Iketani 2016). Most varieties  
10 belong to a species complex with ten basic diploid founders ( $2n=16$ ), *C. apetala*, *C. incisa*, *C.*  
11 *jamasakura*, *C. kumanoensis*, *C. leveilleana*, *C. maximowiczii*, *C. nipponica*, *C. sargentii*, *C.*  
12 *spachiana*, and *C. speciosa*.

13 Somei-Yoshino (*C.* × *yedoensis*), also known as Yoshino cherry, is the most popular  
14 variety of flowering cherry. Somei-Yoshino is believed to have been originally bred in a nursery  
15 in the Somei area of Edo (the former name of Tokyo), followed by its spread throughout Japan.  
16 Somei-Yoshino is probably derived from an interspecific hybrid between two diploids ( $2n=16$ )  
17 (Oginuma and Tanaka 1976), *C. spachiana* and *C. speciosa* (Innan et al. 1995; Nakamura et  
18 al. 2015a; Takenaka 1963). An alternative hypothesis is that Somei-Yoshino arose from a cross  
19 between *C. spachiana* and a hybrid of *C. jamasakura* and *C. speciosa* (Kato et al. 2014). It is  
20 self-incompatible, like other members of the Rosaceae family, and accordingly no seeds are  
21 produced by self-pollination. Even if self-pollinated seeds are obtained, genotypes would be  
22 segregated owing to the high heterozygosity. Therefore, Somei-Yoshino is clonally propagated  
23 by grafting or cutting and distributed. The clonality is supported by DNA analyses (Iketani et  
24 al. 2007; Innan et al. 1995). Thus, the taxonomic classification has been well investigated.  
25 However, to the best of our knowledge, there are few studies of the molecular mechanism  
26 underlying flowering in flowering cherry to date, despite extensive analyses of other members  
27 of the family Rosaceae.

28 Some-Yoshino trees are used as standards for forecasting the flowering date of cherry  
29 blossoms in the early spring every year. Bud breaking and flowering are important and  
30 scientifically intriguing growth stages. In buds, the floral primordia are generally initiated in  
31 the summer (late June to August), after which the primordia start to differentiate into floral

1 organs. After differentiation is completed, the buds enter a dormancy period during the winter.  
2 Recent studies have evaluated the molecular mechanisms underlying dormancy release as well  
3 as flowering in fruit tree species belonging to the family Rosaceae (Lloret et al. 2018; Yamane  
4 2014). Phytohormones and transcriptional regulators involved in dormancy initiation and  
5 release have been characterized, including gibberellic acids (GAs) and abscisic acid (ABA).  
6 *DELLA* genes, containing a conserved DELLA motif involved in GA signaling, and  
7 *CBF/DREB1* (C-repeat-binding factor/dehydration responsive element-binding factor 1)  
8 genes involved in cold acclimation have been analyzed in apple (Wisniewski et al. 2015;  
9 Yordanov et al. 2014) and Japanese apricot (Lv et al. 2018). The involvement of ethylene  
10 signaling, perhaps via crosstalk with ABA, has also been discussed based on a study of *EARLY*  
11 *BUD-BREAK 1 (EBB1)*, which encodes an AP2 type/ethylene-responsive transcription  
12 factor (Yordanov et al. 2014). *DORMANCY-ASSOCIATED MADS-BOX (DAM)* genes in  
13 the same family as *SHORT VEGETATIVE PHASE (SVP)* genes (Leida et al. 2010; Yamane  
14 et al. 2011), *FLOWERING LOCUS T (FT)*, and *CENTRORADIALIS (CEN)/ TERMINAL*  
15 *FLOWER 1 (TFL1)*, encoding PEBP-like proteins involved in floral initiation and meristem  
16 development, are involved in dormancy (Kurokura et al. 2013). These previous studies  
17 provide insight into the genetic basis of dormancy and flowering in fruit tree species belonging  
18 to the family Rosaceae.

19 Genetic and genomic analyses are straightforward approaches to gain insights into the  
20 flowering mechanism in cherry blossoms. Whole genome sequences of more than 100 plant  
21 species have been published (Michael and VanBuren 2015). Usually, the targets are haploids  
22 or inbred lines to simplify the genomic complexity. However, advanced long-read sequencing  
23 technologies and bioinformatics methods have made it possible to determine the sequences  
24 of complex genomes (Belser et al. 2018; Jiao and Schneeberger 2017; Kyriakidou et al. 2018).  
25 For example, an assembly strategy for single-molecule real-time sequencing data has been  
26 developed to generate phased sequences in heterozygous regions of F1 hybrids (Chin et al.  
27 2016). Furthermore, chromosome-scale phased genome assemblies for F1 hybrids have been  
28 obtained by linked read sequencing technology, providing long-range genome information  
29 (Hulse-Kemp et al. 2018), or by single-molecule real-time sequencing combined with Hi-C  
30 data (Dudchenko et al. 2017; Kronenberg et al. 2018). Haplotype-resolved sequences have  
31 been obtained for F1 cattle by a trio-binning strategy in which genome sequences with allelic

1 variation are resolved before assembly (Koren et al. 2018).

2 In this study, to determine the molecular mechanisms underlying cherry blossom  
3 flowering, we conducted genome and transcriptome analyses of the interspecific hybrid  
4 Somei-Yoshino. The genome sequence of another interspecific hybrid flowering cherry, *C.* ×  
5 *nudiflora*, formerly named *P. yedoensis* (Katsuki and Iketani 2016), has been published (Baek  
6 et al. 2018). However, all genomic regions derived from the two different progenitor species  
7 (*C. spachiana* and *C. jamasakura*) are totally collapsed. Therefore, we established the phased  
8 genome sequence of *C.* × *yedoensis*, Somei-Yoshino, representing the two genomes of the  
9 probable progenitors (*C. spachiana* and *C. speciosa*). Using the genome sequences as a  
10 reference, a time-course transcriptome analysis of Somei-Yoshino floral buds and flowers,  
11 with a special focus on dormancy and flowering-related genes, was also conducted to  
12 characterize the physiological changes during flowering.

13

## 14 **Materials and methods**

### 15 *Plant materials*

16 A Somei-Yoshino tree grown in Ueno Park (Tokyo, Japan) was used for genome assembly.  
17 This tree, i.e., #136, is presumed to be the original according to a polymorphism analysis of  
18 three genes and its location (Nakamura et al. 2015a; Nakamura et al. 2015b). In addition, 139  
19 varieties, including a Somei-Yoshino clone maintained at Shimane University (SU), Shimane,  
20 Japan, were used for a genetic diversity analysis (Supplementary Table S1). An F1 mapping  
21 population, YSF1, was produced by hand pollination between Yama-Zakura and another clone  
22 of Somei-Yoshino as a female and male parent, respectively, both of which are planted at the  
23 Kazusa DNA Research Institute (KDRI), Chiba, Japan. The Somei-Yoshino clones at SU and  
24 KDRI were used for the transcriptome analysis.

25

### 26 *Clustering analysis of genetically divergent varieties*

27 Genomic DNAs of the 139 varieties were extracted from young leaves using the DNeasy Plant  
28 Mini Kit (Qiagen, Hilden, Germany) and double-digested with the restriction enzymes *Pst*I  
29 and *Eco*RI. ddRAD-Seq libraries were constructed as described previously (Shirasawa et al.  
30 2016) and sequenced using the Illumina HiSeq2000 (San Diego, CA, USA) to obtain 93 bp  
31 paired-end reads. Low-quality reads were trimmed using PRINSEQ v. 0.20.4 (Schmieder and

1 Edwards 2011) and adapter sequences were removed using fastx\_clipper (parameter, -a  
2 AGATCGGAAGAGC) in FASTX-Toolkit v. 0.0.13 ([http://hannonlab.cshl.edu/fastx\\_toolkit](http://hannonlab.cshl.edu/fastx_toolkit)).  
3 The high-quality reads were mapped onto genome sequences of either *P. avium* (Shirasawa  
4 et al. 2017), *P. mume* (Zhang et al. 2012), or *P. persica* (International Peach Genome et al.  
5 2013) using Bowtie2 v. 2.2.3 (Langmead and Salzberg 2012). Biallelic SNPs were called from  
6 the mapping results using the mpileup command in SAMtools v. 0.1.19 (Li et al. 2009), and  
7 low-quality SNPs were removed using VCFtools v. 0.1.12b (Danecek et al. 2011) with the  
8 following criteria: including only sites with a minor allele frequency of  $\geq 0.05$  (--maf 0.05),  
9 including only genotypes supported by  $\geq 5$  reads (--minDP 5), including only sites with a  
10 quality value of  $\geq 999$  (--minQ 999), and excluding sites with  $\geq 50\%$  missing data (--max-  
11 missing 0.5). A dendrogram based on the SNPs was constructed using the neighbor-joining  
12 method implemented in TASSEL 5 (Bradbury et al. 2007) and population structure was  
13 investigated using ADMIXTURE v. 1.3.0 with default settings ( $K = 1$  to 20) (Alexander et al.  
14 2009).

15

#### 16 *Assembly of the 'Somei-Yoshino' genome*

17 Genomic DNA was extracted from young leaves of Somei-Yoshino tree #136 using the  
18 DNeasy Plant Mini Kit (Qiagen). A paired-end sequencing library (insert size of 500 bp) and  
19 three mate-pair libraries (insert sizes of 2 kb, 5 kb, and 8 kb) were constructed using the  
20 TruSeq PCR-free Kit (Illumina) and Mate-pair Kit (Illumina), respectively, and sequenced  
21 using the MiSeq and HiSeqX platforms (Illumina). The size of the Somei-Yoshino genome  
22 was estimated using Jellyfish v. 2.1.4 (Marcais and Kingsford 2011). High-quality reads after  
23 removing adapter sequences and trimming low-quality reads as described above were  
24 assembled using SOAPdenovo2 v. 1.10 (Luo et al. 2012) (parameter -K 121). Gaps,  
25 represented by Ns in the sequence, were filled with high-quality paired-end reads using  
26 GapCloser v. 1.10 (Luo et al. 2012) (parameter -p 31). The resultant sequences were  
27 designated CYE\_r1.0.

28 High-molecular-weight DNA was extracted from young leaves of 'Somei-Yoshino' tree  
29 #136 using Genomic Tip (Qiagen) to prepare the SMRTbell library (PacBio, Menlo Park, CA,  
30 USA). The sequence reads obtained from the PacBio Sequel system were assembled using  
31 FALCON-Unzip (Chin et al. 2016) to obtain an assembly, CYE\_r2.0. Furthermore, the

1 PacBio reads were divided into two subsets using the TrioCanu module of Canu v. 1.7 (Koren  
2 et al. 2018), in which Illumina short reads of two probable ancestors of Somei-Yoshino, i.e.,  
3 *C. spachiana* 'Yaebeni-shidare' and *C. speciosa* 'Ohshima-zakura,' were employed. Each  
4 subset of data was assembled and polished using FALCON assembler v. 2.1.2 (Chin et al.  
5 2013). The two assemblies were designated CYEspachiana\_r3.0 and CYEspeciosa\_r3.0, and  
6 were combined to obtain CYE\_r3.0, representing the Somei-Yoshino genome. Assembly  
7 completeness was evaluated using BUSCO v. 3.0.2 (Simao et al. 2015), for which Plants Set  
8 was employed as datasets, and a mapping rate analysis of whole genome sequence data for  
9 Somei-Yoshino reads to the references was performed (see below for details).

10

#### 11 *Genetic map construction and pseudomolecule establishment*

12 Genomic DNA was extracted from the ovules of YSF1 seeds using the Favorgen Plant Kit  
13 (Ping-Tung, Taiwan) and digested with *Pst*I and *Eco*RI to construct the ddRAD-Seq library.  
14 The library was sequenced on the Illumina NextSeq platform. High-quality reads were  
15 mapped onto CYEspachiana\_r3.0 and CYEspeciosa\_r3.0 using Bowtie2 v. 2.2.3 (Langmead  
16 and Salzberg 2012). Biallelic SNPs were called from the mapping results using the mpileup  
17 command in SAMtools v. 0.1.19 (Li et al. 2009), and low-quality SNPs were deleted using  
18 VCFtools v. 0.1.12b (Danecek et al. 2011) with the criteria used for the clustering analysis  
19 described above. The SNPs from the two references were merged, grouped, and ordered using  
20 Lep-Map3 v. 0.2 (Rastas 2017). Flanking sequences of the SNP sites (100 bases up- and  
21 downstream of the SNPs) were compared with the genome sequence of sweet cherry,  
22 PAV\_r1.0 (Shirasawa et al. 2017), by BlastN with a cutoff value of 1E-40. Probable  
23 misassemblies found in the mapping process were broken, and the resultant sequence set was  
24 designated CYE\_r3.1. According to map positions, the CYE\_r3.1 sequences were oriented  
25 and assigned to the genetic map of 'Somei-Yoshino' to establish pseudomolecule sequences.  
26 Sequence variation between the two pseudomolecule sequences, CYEspachiana\_r3.1 and  
27 CYEspeciosa\_r3.1, was detected using the show-snps function of MUMMER v. 3.23 (Kurtz  
28 et al. 2004), for which outputs from NUCmer were employed. In parallel, the genome  
29 structure of CYE\_r3.1\_pseudomolecule was compared with those of sweet cherry, peach,  
30 Japanese apricot, and apple using D-Genies (Cabanettes and Klopp 2018).

31

1 *Gene prediction and annotation*

2 Total RNA was extracted from 12 stages of buds within 1 month in 2017 as well as from leaves,  
3 stems, sepals, petals, stamens, and carpels. RNA-Seq libraries were prepared using the TruSeq  
4 Stranded mRNA Sample Preparation Kit (Illumina) and sequenced by MiSeq. The obtained  
5 reads were mapped to the CYE\_r3.1 sequences to determine gene positions using TopHat2 v.  
6 2.0.14 (Kim et al. 2013). The positional information was used in BREAKER2 v. 2.1.0 (Hoff  
7 et al. 2016) to gain training data sets for AUGUSTUS v. 3.3 (Stanke et al. 2006) and  
8 GeneMark v. 4.33 (Lomsadze et al. 2005). The two training sets and a preset of SNAP v.  
9 2006-07-28 for *Arabidopsis* as well as peptide sequences of *P. avium* (v1.0.a1), *P. persica*  
10 (v2.0.a1), and *Malus × domestica* (GDDH13 v1.1) registered in the Genome Database for  
11 Rosaceae (Jung et al. 2019) and those of *P. mume* (Zhang et al. 2012) were analyzed using  
12 MAKER pipeline v. 2.31.10 (Cantarel et al. 2008) to predict putative protein-coding genes in  
13 the CYE\_r3.1 sequences. Genes annotated using Hayai-Annotation Plants v. 1.0 (Ghelfi et al.  
14 2019) (with a sequence identity threshold of 80% and query coverage of 80%) were selected  
15 as a high-confidence gene set.

16

17 *Gene clustering, multiple sequence alignment, and divergence time estimation*

18 Potential orthologues were identified from genes predicted in seven genomes (two genomes  
19 of Somei-Yoshino and one each of *P. avium*, *P. mume*, *P. persica*, and *M. × domestica*, as well  
20 as *Arabidopsis thaliana* as an outgroup) using OrthoMCL v. 2.0.9 (Li et al. 2003). The single  
21 copy orthologues in the seven genomes were used to generate a multiple sequence alignment  
22 using MUSCLE v. 3.8.31 (Edgar 2004), in which indels were eliminated by Gblocks v. 0.91b  
23 (Castresana 2000). A phylogenetic tree based on the maximum-likelihood algorithm was  
24 constructed from the alignments with the Jones-Taylor-Thornton model in MEGA X v. 10.0.5  
25 (Kumar et al. 2018). The divergence time was calculated using MEGA X v. 10.0.5 (Kumar et  
26 al. 2018) assuming that the divergence time between *M. × domestica* and *P. persica* was  
27 approximately 34 to 67 MYA in TIMETREE (Kumar et al. 2017).

28

29 *Repetitive sequence analysis*

30 A database of repeat sequences of the Somei-Yoshino genome was established using  
31 RepeatModeler v. 1.0.11 (Smit et al. 2008-2015). The repeat database as well as that

1 registered in Repbase (Bao et al. 2015) were used to predict repetitive sequences in CYE\_r3.1  
2 using RepeatMasker v. 4.0.7 (Smit et al. 2013-2015).

3

#### 4 *Whole genome resequencing analysis*

5 Genomic DNA of eight representative lines of the SU collection and one of the parental lines  
6 of the mapping population, Yama-Zakura, were digested with NEBNext dsDNA Fragmentase  
7 (New England BioLabs, Ipswich, MA, USA) for whole genome shotgun library preparation  
8 using the Illumina TruSeq PCR-free Kit. The sequences were determined on the Illumina  
9 NextSeq platform. Read trimming, read mapping to the CYE\_r3.1 sequence, and SNP  
10 identification were performed as described above. Effects of SNPs on gene functions were  
11 evaluated using SnpEff v. 4.2 (Cingolani et al. 2012).

12

#### 13 *Transcriptome analysis*

14 Additional RNA-Seq libraries were prepared from buds at 24 stages collected in 2017 at KDRI  
15 and in 2014 and 2015 at SU using the TruSeq Stranded mRNA Library Prep Kit (Illumina)  
16 and sequenced on the NextSeq500 (Illumina). High-quality reads after removing adapter  
17 sequences and trimming low-quality reads as mentioned above were mapped to the  
18 pseudomolecule sequences of CYE\_r3.1 using HISAT2 v. 2.1.0 (Kim et al. 2015), and reads  
19 on each gene model were quantified and normalized to determine FPKM values using  
20 StringTie v. 1.3.5 (Pertea et al. 2015) and Ballgown v.2.14.1 (Frazee et al. 2015) in accordance  
21 with the protocol paper (Pertea et al. 2016). The R package WGCNA v.1.66 (Langfelder and  
22 Horvath 2008) was used for network construction and module detection.

23

## 24 **Results**

### 25 *Clustering analysis of cherry varieties*

26 We obtained approximately 1.9 million (M) high-quality reads per line after trimming  
27 adapters and low-quality sequences from the ddRAD-Seq library. The reads were mapped  
28 onto the genome sequences of *P. avium* (PAV\_r1.0), *P. mume*, and *P. persica* (v1.0) with  
29 mapping alignment rates of 70.8%, 77.8%, and 68.7%, respectively (Supplementary Table  
30 S2). We detected 46,278 (*P. avium*), 31,973 (*P. mume*), and 33,199 (*P. persica*) high-  
31 confidence SNPs. A clustering tree based on the 46,278 SNPs and a population structure



1 analysis indicated that the cherry collection was derived from at least eight founders ( $K = 8$ )  
2 (Supplementary Figure S1). The Somei-Yoshino genome consisted of *C. spachiana* and *C.*  
3 *speciosa* genomic features.

4

#### 5 *Assembly of the Somei-Yoshino genome*

6 The 'Somei-Yoshino' genome size was estimated by a k-mer analysis with 14.3 Gb of paired-  
7 end reads ( $20.7\times$ ) obtained by MiSeq (Supplementary Table S3). The distribution of distinct  
8 k-mers ( $k = 17$ ) showed two peaks at multiplicities of 18 and 37, indicating heterozygous and  
9 homozygous regions, respectively (Supplementary Figure S2). This result suggested that the  
10 heterozygosity of the Somei-Yoshino genome was high. In other words, Somei-Yoshino is likely  
11 an interspecific hybrid harboring components of two different genomes. The total size of the  
12 two genomes was approximately 690 Mb.

13 Totals of 132.5 Gb of paired-end reads ( $192\times$  genome coverage) and 69.1 Gb of mate-  
14 pair data ( $100\times$ ) (Supplementary Table S3) were assembled into 1.2 million scaffold  
15 sequences. The total length of the resultant scaffolds, i.e., CYE\_r1.0, was 686.9 Mb, including  
16 63.6 Mb of Ns with an N50 length of 142.5 kb (Supplementary Table S4). Only 62.3% of  
17 complete single copy orthologs in plant genomes were identified in a BUSCO analysis  
18 (Supplementary Table S4). Paired-end reads of Somei-Yoshino ( $20.7\times$ ) were mapped onto  
19 CYE\_r1.0 with a mapping rate of 76.6%. We found that 82.4% of SNPs were homozygous for  
20 the reference type. Ideally, both rates should be close to 100% if the assembly was fully  
21 extended and the two genomes were separated, or phased. Distributions of the sequence  
22 depth of coverage showed a single peak at the expected value of  $21\times$  (Supplementary Figure  
23 S3). When we mapped the reads to the sequence of *C. \times nudiflora* (Pyn.v1) (Baek et al.  
24 2018), two peaks at  $22\times$  (expected) and  $44\times$  (double the expected value) were observed  
25 (Supplementary Figure S3), indicating a mixture of phased and unphased sequences.

26 To extend the sequence contiguity and to improve the genome coverage, PacBio long-  
27 read technology was employed to obtain 37.3 Gb of reads ( $54\times$ ) with an N50 read length of  
28 17 kb (Supplementary Table S3). The long reads were assembled using FALCON-Unzip into  
29 3,226 contigs [470 primary contigs (488 Mb) and 2,756 haplotigs (116 Mb)] spanning a total  
30 length of 605.4 Mb with an N50 length of 2.3 Mb, i.e., CYE\_r2.0 (Supplementary Table S4).  
31 A BUSCO analysis indicated that 97.0% of complete BUSCOs (9.1% single copy and 87.9%

1 duplicated, as expected) were represented in the assembly (Supplementary Table S4). The  
2 mapping rate of the Somei-Yoshino reads was 95.3%, and 97.1% of SNPs were homozygous  
3 for the reference type. Most of the sequences were phased, with one major peak of genome  
4 coverage at  $21\times$  (Supplementary Figure S3); however, the total length was 13% shorter than  
5 the estimated size and no haplotype information was available.

6 We used a trio-binning approach to obtain the entire sequences of the two haplotype  
7 sequences. The long reads (37.3 Gb,  $54\times$ ) were divided into two subsets based on whole  
8 genome resequencing of the two lines, i.e., *C. spachiana* (Yaebini-shidare) and *C. speciosa*  
9 (Ohshima-zakura). The resultant subsets included 18.9 Gb and 18.2 Gb for *C. spachiana* and  
10 *C. speciosa*, respectively, and 0.3 Mb of unassigned reads. The subsets were separately  
11 assembled to obtain 2,281 contigs (717 primary contigs and 1,564 associated contigs  
12 including duplicated repetitive sequences) covering 350.1 Mb, i.e., CYEspachiana\_r3.0, and  
13 2,271 contigs (800 primary contigs and 1,471 associated contigs) covering 340.0 Mb, i.e.,  
14 CYEspachiana\_r3.0 (Supplementary Table S4). The total sequence (i.e., CYE\_r3.0) spanned  
15 690.1 Mb and consisted of 4,552 contigs with an N50 length of 1.0 Mb (Supplementary Table  
16 S4). The complete BUSCO score for CYE\_r3.0 was 96.8% (10.6% single copy and 86.2%  
17 duplicated, as expected), while those for CYEspachiana\_r3.0 and CYEspeciosa\_r3.0 were  
18 90.9% (69.3% single copy and 21.6% duplicated) and 88.9% (72.1% single copy and 16.8%  
19 duplicated), respectively (Supplementary Table S4). The mapping rate of the Somei-Yoshino  
20 reads was as high as 96.3%, and 96.2% of SNPs were homozygous for the reference type. The  
21 sequence depth of coverage was distributed as expected, with a single peak at  $20\times$   
22 (Supplementary Figure S3). Therefore, CYE\_r3.0 was used for further analyses because it  
23 satisfied all of the established criteria.

24

#### 25 *Genetic map for Somei-Yoshino*

26 Approximately 2.0 million high-quality ddRAD-Seq reads per sample were obtained from  
27 YSF1 and mapped to either CYEspachiana\_r3.0 or CYEspeciosa\_r3.0 with alignment rates of  
28 79.3% and 80.3%, respectively (Supplementary Table S5). We detected 16,145 and 17,462  
29 SNPs from the alignments with the references of CYEspachiana\_r3.0 and CYEspeciosa\_r3.0,  
30 respectively. Of these, 23,532 heterozygous SNPs in 'Somei-Yoshino' were used for a linkage  
31 analysis. The SNPs were assigned to eight groups and ordered, covering 458.8 cM with 16,933

1 SNPs in 694 genetic bins (Supplementary Tables S6 and S7). The map was split into two for  
2 *C. spachiana* and *C. speciosa*, covering 448.9 cM with 8,280 SNPs (628 genetic bins) and  
3 446.3 cM with 8,653 SNPs (645 genetic bins), respectively. The genetic bins were common  
4 for 579 loci on the two maps, suggesting that the sequences in the common bins were the  
5 same loci. A comparison of the genetic maps with the genome sequence of sweet cherry,  
6 PAV\_r1.0 (Supplementary Figure S4), indicated a high similarity of the genome structures in  
7 the two species.

8

#### 9 *Genetic anchoring of the assemblies to the chromosomes*

10 In the genetic mapping process, we found 19 potential misassemblies in 18 contig sequences  
11 of CYE\_r3.0. The contigs were broken between SNPs mapped to different linkage groups.  
12 Finally, we obtained 4,571 contigs with an N50 length of 918.2 kb and the same total length  
13 (690.1 Mb). This final version of contigs was named CYE\_r3.1, consisting of  
14 CYEspachiana\_r3.1 (2,292 contigs, N50 length of 1.2 Mb) and CYEspeciosa\_r3.1 (2,279  
15 contigs, N50 length of 800.6 kb) (Table 1). Of these, 184 CYEspachiana\_r3.1 contigs (221.8  
16 Mb) and 262 CYEspeciosa\_r3.1 contigs (199.2 Mb) were assigned to the genetic maps  
17 (Supplementary Tables S8). The contigs were connected with 10,000 Ns to establish the  
18 Somei-Yoshino pseudomolecule sequences consisting of 4,571 contigs covering 418 Mb. The  
19 structures of the two pseudomolecule sequences were well conserved (Fig. 1). We observed  
20 2,371,773 and 2,392,937 sequence variants, including SNPs and indels, in  
21 CYEspachiana\_r3.1 (one variant every 93 bp) and CYEspeciosa\_r3.1 (one variant every 83  
22 bp), respectively, of which 0.4% were deleterious mutations (Supplementary Tables S9). The  
23 structure of the Somei-Yoshino genome showed high synteny with the genomes of other  
24 members of Rosaceae (Supplementary Figure S5).

25

#### 26 *Gene prediction and annotation*

27 We initially predicted 222,168 putative genes using the MAKER pipeline. All genes were  
28 annotated by a similarity search against the UniProtKB database using the Hayai-Annotation  
29 Plants pipeline to select 94,776 non-redundant high-confidence genes. Then, 300 genes  
30 showing sequence similarity to genes involved in flowering and dormancy in the family  
31 Rosaceae (Supplementary Table S10) were manually added. A total of 95,076 genes (48,280

1 and 46,796 from CYEspachiana\_r3.1 and CYEspeciosa\_r3.1, respectively) were selected as a  
2 high-confidence gene set for CYE\_r3.1 (Table 1). The total length of the coding sequences  
3 was 91.9 Mb (13.3% of the CYE\_r3.1) with an N50 length of 1,512 bases and a GC content  
4 of 44.8%. This gene set included 94.9% complete BUSCOs (12.8% single copy and 82.1%  
5 duplicated). Out of the 95,076 genes, 26,463 (27.8%), 34,996 (36.8%), and 46,502 (48.9%)  
6 were assigned to Gene Ontology slim terms in the biological process, cellular component, and  
7 molecular function categories, respectively (Supplementary Table S11). Furthermore, 3,972  
8 genes had enzyme commission numbers.

9 We found two pairs of self-incompatible genes, *S* determinants for pollen (S-RNase) and  
10 pistils (SFB: *S* haplotype-specific F-box); CYE\_r3.1SPE0\_g058440.1 (S-RNase) and  
11 CYE\_r3.1SPE0\_g058430.1 (SFB) were *S* genes of the *PyS1* haplotype, and  
12 CYE\_r3.1SPE0\_g046700.1 (S-RNase) and CYE\_r3.1SPE0\_g046660.1 (SFB) were *S* genes of  
13 *PyS2*. For dormancy, we detected a cluster of six *DAM*-like genes, as reported in the Japanese  
14 apricot genome (Zhang et al. 2012), in the pseudomolecule sequence of SPA1  
15 (CYE\_r3.1SPA1\_g039840.1 to CYE\_r3.1SPA1\_g039890.1). In addition, *CBF* gene clusters  
16 were also found in SPA5 (CYE\_r3.1SPA5\_g014520.1 to CYE\_r3.1SPA5\_g014610.1) and  
17 SPE5 (CYE\_r3.1SPE5\_g016380.1 to CYE\_r3.1SPE5\_g016430.1).

18

#### 19 *Divergence time of Somei-Yoshino ancestors*

20 The predicted genes were clustered with those of apple, sweet cherry, Japanese apricot, peach,  
21 and *Arabidopsis* to obtain 29,091 clusters, involving 36,396 and 35,559 genes from  
22 CYEspachiana\_r3.1 and CYEspeciosa\_r3.1, respectively (Supplementary Table S12). Among  
23 these, 8,125 clusters were common across the tested species, and 1,254 consisting of one gene  
24 from each genome were selected for divergence time estimation. When the divergence time  
25 between apple and peach was set to 34 to 67 MYA, the divergence time between the two  
26 haplotype sequences of Somei-Yoshino was set to 5.52 MYA (Figure 2).

27

#### 28 *Repetitive sequence analysis*

29 A total of 293.3 Mb (42.5%) of CYE\_r3.1 (690.1 Mb) was identified as repetitive sequences,  
30 including transposable elements (Supplementary Table S13), which occupied 142.9 Mb  
31 (40.8%) and 150.4 Mb (44.2%) of CYEspachiana\_r3.1 and CYEspeciosa\_r3.1, respectively.

1 The most prominent repeat types were long-terminal repeat retrotransposons (104.0 Mb;  
2 14.1%), e.g., *Gypsy*- and *Copia*-types, followed by DNA transposons (65.1 Mb; 8.8%).

#### 3 *Whole genome resequencing analysis*

4 Approximately 136 million high-quality whole genome sequence reads was obtained from  
5 eight representatives in a population structure analysis (Supplementary Table S14) and the  
6 parents of the mapping population, Yama-Zakura and 'Somei-Yoshino.' In addition, 250  
7 million sequence reads of *C. × nudiflora* (Baek et al. 2018) (SRA accession number  
8 SRX3900230) was also employed. The reads were aligned to CYE\_r3.1 as a reference with a  
9 mapping rate of 88.0%, on average. From the alignment data, we detected 2,307,670 SNPs  
10 and 169,664 indels, including 658,873 SNPs and 42,286 indels (28.3%) in  
11 CYEspachiana\_r3.1 and 1,648,797 SNPs and 127,378 indels (71.7%) in CYEspeciosa\_r3.1.  
12 Of these, 8,872 SNPs (0.4%) were deleterious mutations (Supplementary Tables S15).

13  
14 In Somei-Yoshino, the reads were evenly mapped to the references of CYEspachiana\_r3.1  
15 (48.7%) and CYEspeciosa\_r3.1 (47.6%) (Supplementary Figure S6). Most of the loci (94.5%  
16 of SNPs in CYEspachiana\_r3.1 and 96.9% in CYEspeciosa\_r3.1) were homozygous for the  
17 reference type, as expected (Supplementary Figure S7). Only 61.7% and 52.9% of SNPs in *C.*  
18 *× nudiflora* were reference-type homozygotes on CYEspachiana\_r3.1 and CYEspeciosa\_r3.1,  
19 respectively (Supplementary Figure S6), and read mapping rates were 52.2%  
20 (CYEspachiana\_r3.1) and 39.8% (CYEspeciosa\_r3.1) (Supplementary Figure S7).

21 In *C. spachiana* (Yaebeni-shidare), 69.8% of the reads were preferentially mapped to  
22 CYEspachiana\_r3.1 (Supplementary Figure S6), and 80.1% of SNPs detected in  
23 CYEspachiana\_r3.1 were homozygous for the reference type (Supplementary Figure S7). In  
24 *C. speciose* (Ohshima-zakura), 61.1% of reads were mapped to CYEspeciosa\_r3.1  
25 (Supplementary Figure S6) and 73.5% of SNPs in CYEspeciosa\_r3.1 were homozygous for  
26 the reference type (Supplementary Figure S7). In the remaining seven lines, mapping rates  
27 on CYEspeciosa\_r3.1 were higher than those on CYEspachiana\_r3.1, as in *C. speciose*  
28 (Ohshima-zakura) (Supplementary Figure S6).

#### 29 *Transcriptome analysis of flowering dates*

30 RNA-Seq reads were obtained from 12 stages of buds collected every month from May 2014  
31

1 to April 2015 (Supplementary Table S16) as well as from the 12 stages from 2 to 34 days  
2 before anthesis in 2017 used for gene prediction. After trimming, the reads as well as those  
3 for the six organs used in the gene prediction analyses were mapped to CYE\_r3.1 with a  
4 mapping rate of 67.6%, on average. Among the 95,076 predicted genes, 72,248 (76.0%) with  
5 a variance across samples of  $\geq 1$  were selected. A WGCNA analysis was performed with the  
6 expression data for the 24 buds to generate 31 highly co-expressed gene clusters, referred to  
7 as modules (Supplementary Figure S8). The modules were roughly grouped into three main  
8 classes expressed in the previous year of flowering, within 1 month, and within 1 week  
9 (Supplementary Figure S9).

10 Based on the literature and databases for Rosaceae, we identified dormancy- and  
11 flowering-associated genes (i.e., *DELLA*, *CBF/DREB1*, *EBB1*, *DAM (SVP)*, *FT*, and  
12 *CEN/TFL1* genes). We detected 35 predicted genes in the Somei-Yoshino genome, 16 of  
13 which were expressed in  $\geq 1$  sample. The expression patterns basically agreed with those of  
14 the modules and could be roughly classified into five groups (Figure 3). The first group (blue  
15 and magenta gene modules in Supplementary Figure S8) consisted of four genes homologous  
16 to *DELLA* genes. Their expression levels were elevated in the floral buds about 1 month  
17 before anthesis; expression was also observed in young vegetative buds. The second group  
18 (turquoise, brown, and salmon gene modules) were highly expressed in the summer and  
19 autumn (from July to November) in the floral buds. Six genes homologous to *CBF/DREB1*  
20 belonged to this group; however, these were classified into three different clusters on the  
21 dendrogram. The third group (turquoise gene module) consisted of two *EBB1* homologs and  
22 one *DAM(SVP)* homolog; these genes were highly expressed in the autumn and winter (from  
23 October to December). In the fourth group (turquoise gene module), genes were highly  
24 expressed in the winter 2–3 months before anthesis and were homologous to *FT* genes. The  
25 fifth group (red gene module) solely included *CEN/TFL1*-like genes specifically expressed in  
26 vegetative state buds before flower differentiation.

27

## 28 Discussion

29 We obtained the genome sequence of the flowering cherry Somei-Yoshino. To the best of our  
30 knowledge, this is the first report of a phased genome sequence of an interspecific hybrid in  
31 the family Rosaceae or in the kingdom of Plantae, broadly, although genome sequences have

1 been reported for several species belonging to Rosaceae (Jung et al. 2019). Although the  
2 genome of another interspecific hybrid cherry flower, *C. × nudiflora*, has been reported (Baek  
3 et al. 2018), the two homoeologous ancestral genomes (*C. spachiana* and *C. jamasakura*) are  
4 totally collapsed, as indicted by the double peaks of sequence depth (Supplementary Figure  
5 S3), resulting in a short assembly size (323.8 Mb). The genome complexity of interspecific  
6 hybrids could be compared to those of polyploids and highly heterozygous species. Genome  
7 sequences of polyploids and F1 hybrids have been obtained (Chin et al. 2016; Hulse-Kemp et  
8 al. 2018) by single-molecule real-time sequencing technology, linked read sequencing, optical  
9 maps, and Hi-C (Belser et al. 2018; Jiao and Schneeberger 2017; Kyriakidou et al. 2018).  
10 These technologies to obtain phased genome assemblies are limited by haplotype switching  
11 (Kronenberg et al. 2018), where two haplotypes are patched to make mosaic genome  
12 sequences.

13 We employed the trio-binning technique (Koren et al. 2018) to determine haplotype  
14 phases before assembly. This technique was initially developed to construct phased genome  
15 sequences of an F1 hybrid between cattle subspecies. Since sequence reads of two sub-  
16 genomes were divided into two subsets according to the sequences of the parents, haplotype  
17 switching is avoidable. We applied the trio-binning technique to the interspecific hybrid  
18 cherry tree. We verified the quality and accuracy of the resultant assembly, CYE\_r3.0, by a  
19 BUSCO analysis (Supplementary Table S4), the mapping rate of Somei-Yoshino reads to the  
20 assemblies (Supplementary Figure S6), and SNP genotypes detected in the mapping results.  
21 In addition, the genetic map (Supplementary Table S6 and S7) and a comparative analysis of  
22 the pseudomolecule sequences (Figure 1 and Supplementary Figure S4 and S5) also  
23 supported the quality and accuracy of the assembly. The results of this study suggested that  
24 the trio-binning strategy is useful for determining phased genome sequences for highly  
25 heterozygous genomes of interspecific hybrids.

26 Our genome data provided insight into the progenitors of Somei-Yoshino. Our results  
27 were consistent with the conclusions of Baek et al. (2018), who found that Somei-Yoshino, *C.*  
28 *× yedoensis*, is distinct from a variety in Jeju Island, Korea, *C. × nudiflora*. In the present  
29 study, a population structure analysis indicated that Somei-Yoshino was established by two  
30 founders, *C. spachiana* and *C. speciosa* (Figure 2, Supplementary Figure S1), as suggested in  
31 previous studies (Innan et al. 1995; Takenaka 1963). In a whole genome resequencing analysis,

1 sequence reads of *C. spachiana* ‘Yaebeni-shidare’ were preferentially mapped to SPA  
2 sequences (Supplementary Figure S6), and genotypes of most SNPs were homozygous for the  
3 reference type (Supplementary Figure S7). This indicated that the sequence similarity of *C.*  
4 *spachiana* ‘Yaebeni-shidare’ and CYEspachiana\_r3.1 was high and therefore that *C. spachiana*  
5 is a candidate parent. While reads of *C. speciosa* ‘Ohshima-zakura’ were mapped to  
6 CYEspeciosa\_r3.1 sequences (Supplementary Figure S6), the frequency of SNP genotypes  
7 homozygous for the reference type was not as high as that for *C. spachiana* (Supplementary  
8 Figure S7). This observation suggests that *C. speciosa* is not an actual parent of Somei-  
9 Yoshino (Kato et al. 2014). Somei-Yoshino genome data can be used in future studies of the  
10 origin to determine the most likely parents.

11 We obtained a number of predicted genes. Transcriptome data for the developing bud  
12 provided a comprehensive overview of genes expressed during dormancy and flowering  
13 processes (Figure 3). Our analysis was based on previous studies of key genes and  
14 fundamental molecular mechanisms underlying dormancy (Lloret et al. 2018; Yamane 2014).  
15 Despite some discrepancies, the gene expression patterns observed in our study were  
16 generally consistent with previously observed patterns in deciduous fruit tree species in  
17 Rosaceae. The relatively high expression levels of *DELLA* genes observed at 1 month before  
18 anthesis corresponded to the time at which the bud typically transitions from endodormancy  
19 to ecodormancy (Lv et al. 2018). GA signaling may reactivate bud development internally at  
20 the ecodormancy stage (Wen et al. 2016). The relatively high expression levels of  
21 *CBF/DREB1* in the summer and decreased expression levels toward the winter is consistent  
22 with a role in cold acclimation, as previously reported in almond (Saibo et al. 2012). We  
23 detected one *DAM* gene that was highly expressed in dormant buds in the winter, in  
24 agreement with previous reports (Yamane et al. 2006); however, two *EBB1* genes, assigned  
25 to the same module as *DAM* genes, showed different expression patterns from those in apple  
26 and poplar, in which the genes exhibit sharp increases in expression before bud breaking  
27 (Wisniewski et al. 2015; Yordanov et al. 2014). This inconsistency may be explained by  
28 differences in regulatory mechanisms underlying bud breaking. *FT* genes showed elevated  
29 expression levels in buds in February, when endodormancy is almost completed. In addition  
30 to the function of floral induction, unknown functions of *FT* genes during dormancy are  
31 possible. Interestingly, transgenic plum (*Prunus domestica*) with overexpressed poplar *FT*



1 (*PtFTI*) does not enter a state of endodormancy upon cold treatment or, alternatively, has no  
2 chilling requirement after dormancy is established (Srinivasan et al. 2012). Further studies of  
3 the role of *FT* genes in dormancy are needed. *CEN/TFL1* was highly expressed only in  
4 vegetative buds before floral initiation. This observation was consistent with other previous  
5 results for species in the family Rosaceae (Esumi et al. 2010; Mimida et al. 2009). Our  
6 transcriptome data for flowering cherry successfully revealed the comprehensive changes in  
7 gene expression during floral bud development toward flowering. The expression patterns of  
8 above genes in this study and supposed regulation network for dormancy release of woody  
9 plants (Falavigna et al. 2019; Lloret et al. 2018; Singh et al. 2018) are jointly summarized in  
10 Figure 4. The transcriptome data set provides a basis for further research aimed at identifying  
11 additional genes involved in floral bud development and flowering. Especially, identifying  
12 genes involved in the regulation of flowering under *FT* gene (protein) signaling and GA  
13 signaling processes is intriguing, and those may be able to utilize for accurate forecasting the  
14 flowering date of cherry blossoms.

15 The genome and transcriptome data obtained in this study are expected to accelerate  
16 genomic and genetic analyses of flowering cherry. Owing to the complicated genomes, it is  
17 necessary to build additional *de novo* assemblies for divergent flowering cherries, which is a  
18 challenging task. Genome-graph-based pan-genome analyses could be used to characterize  
19 the complex genomes (Rakocevic et al. 2019). The Somei-Yoshino genome sequence would  
20 be a resource for the flowering cherry pan-genome analyses. It may provide insights into the  
21 evolution and cultivation of flowering cherry as well as the molecular mechanism underlying  
22 flowering traits in the species and in the family Rosaceae, and it may guide the future  
23 cultivation and breeding of flowering cherry.

24

#### 25 **Data availability**

26 The sequence reads are available from the DDBJ Sequence Read Archive (DRA) under the  
27 accession numbers DRA008094, DRA008096, DRA008097, DRA008099, and DRA008100.  
28 The WGS accession numbers of assembled scaffold sequences are BJCG01000001-  
29 BJCG01004571 (4,571 entries). The genome assembly data, annotations, gene models,  
30 genetic maps, and DNA polymorphism information are available at DBcherry  
31 (<http://cherry.kazusa.or.jp>).

1

## 2 **Acknowledgments**

3 We thank Ueno Park (Tokyo, Japan) for providing the Somei-Yoshino sample. We are  
4 grateful to Drs G. Concepcion and P. Peluso (PacBio, CA, USA) and Mr. K. Osaki (Tomy  
5 Digital Biology, Tokyo, Japan) for their helpful advice, and S. Sasamoto, S. Nakayama, A.  
6 Watanabe, T. Fujishiro, Y. Kishida, C. Minami, A. Obara, H. Tsuruoka, and M. Yamada  
7 (Kazusa DNA Research Institute) for their technical assistance. This work was supported by  
8 the Kazusa DNA Research Institute Foundation, and supported in part by a Grant-in-Aid  
9 for Young Scientists (B) No. 26850017 (to T. E.) from Japan Society for the Promotion of  
10 Science (JSPS).

11

## 12 **References**

- 13 Alexander DH, Novembre J, Lange K (2009) Fast model-based estimation of ancestry in unrelated  
14 individuals. *Genome Res* 19:1655-1664
- 15 Baek S, Choi K, Kim GB, Yu HJ, Cho A, Jang H, Kim C, Kim HJ, Chang KS, Kim JH, Mun JH (2018) Draft  
16 genome sequence of wild *Prunus yedoensis* reveals massive inter-specific hybridization  
17 between sympatric flowering cherries. *Genome Biol* 19:127
- 18 Bao W, Kojima KK, Kohany O (2015) Repbase Update, a database of repetitive elements in eukaryotic  
19 genomes. *Mob DNA* 6:11
- 20 Belser C, Istace B, Denis E, Dubarry M, Baurens FC, Falentin C, Genete M, Berrabah W, Chevre AM,  
21 Delourme R, Deniot G, Denoeud F, Duffe P, Engelen S, Lemainque A, Manzaneres-Dauleux M,  
22 Martin G, Morice J, Noel B, Vekemans X, D'Hont A, Rousseau-Gueutin M, Barbe V, Cruaud C,  
23 Wincker P, Aury JM (2018) Chromosome-scale assemblies of plant genomes using nanopore  
24 long reads and optical maps. *Nat Plants* 4:879-887
- 25 Bradbury PJ, Zhang Z, Kroon DE, Casstevens TM, Ramdoss Y, Buckler ES (2007) TASSEL: software for  
26 association mapping of complex traits in diverse samples. *Bioinformatics* 23:2633-2635
- 27 Cabanettes F, Klopp C (2018) D-GENIES: dot plot large genomes in an interactive, efficient and simple  
28 way. *PeerJ* 6:e4958
- 29 Cantarel BL, Korf I, Robb SM, Parra G, Ross E, Moore B, Holt C, Sanchez Alvarado A, Yandell M (2008)  
30 MAKER: an easy-to-use annotation pipeline designed for emerging model organism genomes.  
31 *Genome Res* 18:188-196
- 32 Castresana J (2000) Selection of conserved blocks from multiple alignments for their use in  
33 phylogenetic analysis. *Mol Biol Evol* 17:540-552
- 34 Chin CS, Alexander DH, Marks P, Klammer AA, Drake J, Heiner C, Clum A, Copeland A, Huddleston J,

- 1 Eichler EE, Turner SW, Korlach J (2013) Nonhybrid, finished microbial genome assemblies  
2 from long-read SMRT sequencing data. *Nat Methods* 10:563-569
- 3 Chin CS, Peluso P, Sedlazeck FJ, Nattestad M, Concepcion GT, Clum A, Dunn C, O'Malley R, Figueroa-  
4 Balderas R, Morales-Cruz A, Cramer GR, Delledonne M, Luo C, Ecker JR, Cantu D, Rank DR,  
5 Schatz MC (2016) Phased diploid genome assembly with single-molecule real-time sequencing.  
6 *Nat Methods* 13:1050-1054
- 7 Cingolani P, Platts A, Wang le L, Coon M, Nguyen T, Wang L, Land SJ, Lu X, Ruden DM (2012) A program  
8 for annotating and predicting the effects of single nucleotide polymorphisms, SnpEff: SNPs in  
9 the genome of *Drosophila melanogaster* strain w1118; iso-2; iso-3. *Fly (Austin)* 6:80-92
- 10 Danecek P, Auton A, Abecasis G, Albers CA, Banks E, DePristo MA, Handsaker RE, Lunter G, Marth GT,  
11 Sherry ST, McVean G, Durbin R, Genomes Project Analysis G (2011) The variant call format and  
12 VCFtools. *Bioinformatics* 27:2156-2158
- 13 Dudchenko O, Batra SS, Omer AD, Nyquist SK, Hoeger M, Durand NC, Shamim MS, Machol I, Lander  
14 ES, Aiden AP, Aiden EL (2017) De novo assembly of the *Aedes aegypti* genome using Hi-C yields  
15 chromosome-length scaffolds. *Science* 356:92-95
- 16 Edgar RC (2004) MUSCLE: a multiple sequence alignment method with reduced time and space  
17 complexity. *BMC Bioinformatics* 5:113
- 18 Esumi T, Kitamura Y, Hagihara C, Yamane H, Tao R (2010) Identification of a TFL1 ortholog in Japanese  
19 apricot (*Prunus mume* Sieb. et Zucc.). *Sci Hortic-Amsterdam* 125:608-616
- 20 Falavigna G, Costantino G, Furlan R, Quinn JV, Ungar A, Ippoliti R (2019) Artificial neural networks  
21 and risk stratification in emergency departments. *Intern Emerg Med* 14:291-299
- 22 Frazee AC, Pertea G, Jaffe AE, Langmead B, Salzberg SL, Leek JT (2015) Ballgown bridges the gap  
23 between transcriptome assembly and expression analysis. *Nat Biotechnol* 33:243-246
- 24 Ghelfi A, Shirasawa K, Hirakawa H, Isobe S (2019) Hayai-Annotation Plants: an ultra-fast and  
25 comprehensive gene annotation system in plants. *BioRxiv* doi: 10.1101/473488
- 26 Hoff KJ, Lange S, Lomsadze A, Borodovsky M, Stanke M (2016) BRAKER1: Unsupervised RNA-Seq-  
27 Based Genome Annotation with GeneMark-ET and AUGUSTUS. *Bioinformatics* 32:767-769
- 28 Hulse-Kemp AM, Maheshwari S, Stoffel K, Hill TA, Jaffe D, Williams SR, Weisenfeld N, Ramakrishnan S,  
29 Kumar V, Shah P, Schatz MC, Church DM, Van Deynze A (2018) Reference quality assembly of  
30 the 3.5-Gb genome of *Capsicum annuum* from a single linked-read library. *Hortic Res* 5:4
- 31 Iketani H, Ohta S, Kawahara T, Katsuki T, Mase N, Sato Y, Yamamoto T (2007) Analyses of Clonal Status  
32 in 'Somei-yoshino' and Confirmation of Genealogical Record in Other Cultivars of *Prunus* ×  
33 *yedoensis* by Microsatellite Markers. *Breeding Science* 57:1-6
- 34 Innan H, Terauchi R, Miyashita NT, Tsunewaki K (1995) DNA fingerprinting study on the intraspecific  
35 variation and the origin of *Prunus yedoensis* (Someiyoshino). *Jpn J Genet* 70:185-196
- 36 International Peach Genome I, Verde I, Abbott AG, Scalabrin S, Jung S, Shu S, Marroni F, Zhebentyayeva

- 1 T, Dettori MT, Grimwood J, Cattonaro F, Zuccolo A, Rossini L, Jenkins J, Vendramin E, Meisel LA,  
2 Decroocq V, Sosinski B, Prochnik S, Mitros T, Policriti A, Cipriani G, Dondini L, Ficklin S,  
3 Goodstein DM, Xuan P, Del Fabbro C, Aramini V, Copetti D, Gonzalez S, Horner DS, Falchi R,  
4 Lucas S, Mica E, Maldonado J, Lazzari B, Bielenberg D, Pirona R, Miculan M, Barakat A, Testolin  
5 R, Stella A, Tartarini S, Tonutti P, Arus P, Orellana A, Wells C, Main D, Vizzotto G, Silva H, Salamini  
6 F, Schmutz J, Morgante M, Rokhsar DS (2013) The high-quality draft genome of peach (*Prunus*  
7 *persica*) identifies unique patterns of genetic diversity, domestication and genome evolution.  
8 *Nat Genet* 45:487-494
- 9 Jiao WB, Schneeberger K (2017) The impact of third generation genomic technologies on plant  
10 genome assembly. *Curr Opin Plant Biol* 36:64-70
- 11 Jung S, Lee T, Cheng CH, Buble K, Zheng P, Yu J, Humann J, Ficklin SP, Gasic K, Scott K, Frank M, Ru S,  
12 Hough H, Evans K, Peace C, Olmstead M, DeVetter LW, McFerson J, Coe M, Wegrzyn JL, Staton  
13 ME, Abbott AG, Main D (2019) 15 years of GDR: New data and functionality in the Genome  
14 Database for Rosaceae. *Nucleic Acids Res* 47:D1137-D1145
- 15 Kato S, Matsumoto A, Yoshimura K, Katsuki T, Iwamoto K, Kawahara T, Mukai Y, Tsuda Y, Ishio S,  
16 Nakamura K, Moriwaki K, Shiroishi T, Gojobori T, Yoshimaru H (2014) Origins of Japanese  
17 flowering cherry (*Prunus* subgenus *Cerasus*) cultivars revealed using nuclear SSR markers.  
18 *Tree Genetics & Genomes* 10:477-487
- 19 Kato S, Matsumoto A, Yoshimura K, Katsuki T, Iwamoto K, Tsuda Y, Ishio S, Nakamura K, Moriwaki K,  
20 Shiroishi T, Gojobori T, Yoshimaru H (2012) Clone identification in Japanese flowering cherry  
21 (*Prunus* subgenus *Cerasus*) cultivars using nuclear SSR markers. *Breed Sci* 62:248-255
- 22 Katsuki T, Iketani H (2016) Nomenclature of Tokyo cherry (*Cerasus* x *yedoensis* 'Somei-yoshino',  
23 Rosaceae) and allied interspecific hybrids based on recent advances in population genetics.  
24 *Taxon* 65:1415-1419
- 25 Kim D, Langmead B, Salzberg SL (2015) HISAT: a fast spliced aligner with low memory requirements.  
26 *Nat Methods* 12:357-360
- 27 Kim D, Pertea G, Trapnell C, Pimentel H, Kelley R, Salzberg SL (2013) TopHat2: accurate alignment of  
28 transcriptomes in the presence of insertions, deletions and gene fusions. *Genome Biol* 14:R36
- 29 Koren S, Rhie A, Walenz BP, Dilthey AT, Bickhart DM, Kingan SB, Hiendleder S, Williams JL, Smith TPL,  
30 Phillippy AM (2018) De novo assembly of haplotype-resolved genomes with trio binning. *Nat*  
31 *Biotechnol* 36:1174-1182
- 32 Kronenberg ZN, Hall RJ, Hiendleder S, Smith TPL, Sullivan ST, Williams JL, Kingan SB (2018) FALCON-  
33 Phase: Integrating PacBio and Hi-C data for phased diploid genomes. *BioRxiv* doi:  
34 10.1101/327064
- 35 Kumar S, Stecher G, Li M, Knyaz C, Tamura K (2018) MEGA X: Molecular Evolutionary Genetics  
36 Analysis across Computing Platforms. *Mol Biol Evol* 35:1547-1549

- 1 Kumar S, Stecher G, Suleski M, Hedges SB (2017) TimeTree: A Resource for Timelines, Timetrees, and
- 2 Divergence Times. *Mol Biol Evol* 34:1812-1819
- 3 Kurokura T, Mimida N, Battey NH, Hytonen T (2013) The regulation of seasonal flowering in the
- 4 Rosaceae. *Journal of Experimental Botany* 64:4131-4141
- 5 Kurtz S, Phillippy A, Delcher AL, Smoot M, Shumway M, Antonescu C, Salzberg SL (2004) Versatile and
- 6 open software for comparing large genomes. *Genome Biol* 5:R12
- 7 Kyriakidou M, Tai HH, Anglin NL, Ellis D, Stromvik MV (2018) Current Strategies of Polyploid Plant
- 8 Genome Sequence Assembly. *Front Plant Sci* 9:1660
- 9 Langfelder P, Horvath S (2008) WGCNA: an R package for weighted correlation network analysis. *BMC*
- 10 *Bioinformatics* 9:559
- 11 Langmead B, Salzberg SL (2012) Fast gapped-read alignment with Bowtie 2. *Nat Methods* 9:357-359
- 12 Leida C, Terol J, Marti G, Agusti M, Llacer G, Badenes ML, Rios G (2010) Identification of genes
- 13 associated with bud dormancy release in *Prunus persica* by suppression subtractive
- 14 hybridization. *Tree Physiol* 30:655-666
- 15 Li H, Handsaker B, Wysoker A, Fennell T, Ruan J, Homer N, Marth G, Abecasis G, Durbin R, Genome
- 16 Project Data Processing S (2009) The Sequence Alignment/Map format and SAMtools.
- 17 *Bioinformatics* 25:2078-2079
- 18 Li L, Stoeckert CJ, Jr, Roos DS (2003) OrthoMCL: identification of ortholog groups for eukaryotic
- 19 genomes. *Genome Res* 13:2178-2189
- 20 Lloret A, Badenes ML, Ríos G (2018) Modulation of Dormancy and Growth Responses in Reproductive
- 21 Buds of Temperate Trees. *Frontiers in Plant Science* 9:1368
- 22 Lomsadze A, Ter-Hovhannisyan V, Chernoff YO, Borodovsky M (2005) Gene identification in novel
- 23 eukaryotic genomes by self-training algorithm. *Nucleic Acids Res* 33:6494-6506
- 24 Luo R, Liu B, Xie Y, Li Z, Huang W, Yuan J, He G, Chen Y, Pan Q, Liu Y, Tang J, Wu G, Zhang H, Shi Y, Liu Y,
- 25 Yu C, Wang B, Lu Y, Han C, Cheung DW, Yiu SM, Peng S, Xiaoqian Z, Liu G, Liao X, Li Y, Yang H,
- 26 Wang J, Lam TW, Wang J (2012) SOAPdenovo2: an empirically improved memory-efficient
- 27 short-read de novo assembler. *Gigascience* 1:18
- 28 Lv L, Huo XM, Wen LH, Gao ZH, Khalil-ur-Rehman M (2018) Isolation and Role of PmRGL2 in GA-
- 29 mediated Floral Bud Dormancy Release in Japanese Apricot (*Prunus mume* Siebold et Zucc.).
- 30 *Frontiers in Plant Science* 9:27
- 31 Marçais G, Kingsford C (2011) A fast, lock-free approach for efficient parallel counting of occurrences
- 32 of k-mers. *Bioinformatics* 27:764-770
- 33 Michael TP, VanBuren R (2015) Progress, challenges and the future of crop genomes. *Current Opinion*
- 34 *in Plant Biology* 24:71-81
- 35 Mimida N, Kotoda N, Ueda T, Igarashi M, Hatsuyama Y, Iwanami H, Moriya S, Abe K (2009) Four
- 36 TFL1/CEN-like genes on distinct linkage groups show different expression patterns to regulate

- 1 vegetative and reproductive development in apple (*Malus x domestica* Borkh.). *Plant Cell*  
2 *Physiol* 50:394-412
- 3 Nakamura I, Takahashi H, Ohta S, Moriizumi T, Hanashiro Y, Sato Y, Mill M (2015a) Origin of *Prunus x*  
4 *yedoensis* 'Somei-yoshino' based on sequence analysis of *PolA1* gene. *Adv Hort Sci* 29:17-23
- 5 Nakamura I, Tsuchiya A, Takahashi H, Makabe S (2015b) Candidate of the original 'Somei-yoshino'  
6 tree in the Ueno Park. *Breed Res* 17:56
- 7 Oginuma K, Tanaka R (1976) Karyomorphological studies on some cherry trees in Japan. *J Jap Bot*  
8 51:104-109
- 9 Perteua M, Kim D, Perteua GM, Leek JT, Salzberg SL (2016) Transcript-level expression analysis of RNA-  
10 seq experiments with HISAT, StringTie and Ballgown. *Nat Protoc* 11:1650-1667
- 11 Perteua M, Perteua GM, Antonescu CM, Chang TC, Mendell JT, Salzberg SL (2015) StringTie enables  
12 improved reconstruction of a transcriptome from RNA-seq reads. *Nat Biotechnol* 33:290-295
- 13 Rakocevic G, Semenyuk V, Lee WP, Spencer J, Browning J, Johnson IJ, Arsenijevic V, Nadj J, Ghose K,  
14 Suciuc MC, Ji SG, Demir G, Li L, Toptas BC, Dolgoborodov A, Pollex B, Spulber I, Glotova I, Komar  
15 P, Stachyra AL, Li Y, Popovic M, Kallberg M, Jain A, Kural D (2019) Fast and accurate genomic  
16 analyses using genome graphs. *Nat Genet* 51:354-362
- 17 Rastas P (2017) Lep-MAP3: robust linkage mapping even for low-coverage whole genome sequencing  
18 data. *Bioinformatics* 33:3726-3732
- 19 Saibo NJM, Gonçalves N, Barros PM, Oliveira MM (2012) Cold acclimation and floral development in  
20 almond bud break: insights into the regulatory pathways. *Journal of Experimental Botany*  
21 63:4585-4596
- 22 Schmieder R, Edwards R (2011) Quality control and preprocessing of metagenomic datasets.  
23 *Bioinformatics* 27:863-864
- 24 Shirasawa K, Hirakawa H, Isobe S (2016) Analytical workflow of double-digest restriction site-  
25 associated DNA sequencing based on empirical and in silico optimization in tomato. *DNA Res*  
26 23:145-153
- 27 Shirasawa K, Isuzugawa K, Ikenaga M, Saito Y, Yamamoto T, Hirakawa H, Isobe S (2017) The genome  
28 sequence of sweet cherry (*Prunus avium*) for use in genomics-assisted breeding. *DNA Res*  
29 24:499-508
- 30 Simao FA, Waterhouse RM, Ioannidis P, Kriventseva EV, Zdobnov EM (2015) BUSCO: assessing  
31 genome assembly and annotation completeness with single-copy orthologs. *Bioinformatics*  
32 31:3210-3212
- 33 Singh RK, Maurya JP, Azeez A, Miskolczi P, Tylewicz S, Stojkovic K, Delhomme N, Busov V, Bhalerao RP  
34 (2018) A genetic network mediating the control of bud break in hybrid aspen. *Nat Commun*  
35 9:4173
- 36 Smit A, Hubley R, Green P (2008-2015) RepeatModeler Open-1.0 <http://www.repeatmasker.org>

- 1 Smit A, Hubley R, Green P (2013-2015) RepeatMasker Open-4.0 <http://www.repeatmasker.org>
- 2 Srinivasan C, Dardick C, Callahan A, Scorza R (2012) Plum (*Prunus domestica*) trees transformed with  
3 poplar FT1 result in altered architecture, dormancy requirement, and continuous flowering.  
4 *PLoS One* 7:e40715
- 5 Stanke M, Keller O, Gunduz I, Hayes A, Waack S, Morgenstern B (2006) AUGUSTUS: ab initio prediction  
6 of alternative transcripts. *Nucleic Acids Res* 34:W435-439
- 7 Takenaka Y (1963) The Origin of the Yoshino Cherry Tree. *Journal of Heredity* 54:207-211
- 8 Wen LH, Zhong WJ, Huo XM, Zhuang WB, Ni ZJ, Gao ZH (2016) Expression analysis of ABA- and GA-  
9 related genes during four stages of bud dormancy in Japanese apricot (*Prunus mume* Sieb. et  
10 Zucc). *J Hortic Sci Biotech* 91:362-369
- 11 Wisniewski M, Norelli J, Artlip T (2015) Overexpression of a peach CBF gene in apple: a model for  
12 understanding the integration of growth, dormancy, and cold hardiness in woody plants. *Front*  
13 *Plant Sci* 6:85
- 14 Yamane H (2014) Regulation of Bud Dormancy and Bud Break in Japanese Apricot (*Prunus mume*  
15 Siebold & Zucc.) and Peach [*Prunus persica* (L.) Batsch]: A Summary of Recent Studies. *J Jpn*  
16 *Soc Hortic Sci* 83:187-202
- 17 Yamane H, Kashiwa Y, Kakehi E, Yonemori K, Mori H, Hayashi K, Iwamoto K, Tao R, Kataoka I (2006)  
18 Differential expression of dehydrin in flower buds of two Japanese apricot cultivars requiring  
19 different chilling requirements for bud break. *Tree Physiol* 26:1559-1563
- 20 Yamane H, Ooka T, Jotatsu H, Hosaka Y, Sasaki R, Tao R (2011) Expressional regulation of PpDAM5  
21 and PpDAM6, peach (*Prunus persica*) dormancy-associated MADS-box genes, by low  
22 temperature and dormancy-breaking reagent treatment. *Journal of Experimental Botany*  
23 62:3481-3488
- 24 Yordanov YS, Ma C, Strauss SH, Busov VB (2014) EARLY BUD-BREAK 1 (EBB1) is a regulator of release  
25 from seasonal dormancy in poplar trees. *Proc Natl Acad Sci U S A* 111:10001-10006
- 26 Zhang Q, Chen W, Sun L, Zhao F, Huang B, Yang W, Tao Y, Wang J, Yuan Z, Fan G, Xing Z, Han C, Pan H,  
27 Zhong X, Shi W, Liang X, Du D, Sun F, Xu Z, Hao R, Lv T, Lv Y, Zheng Z, Sun M, Luo L, Cai M, Gao Y,  
28 Wang J, Yin Y, Xu X, Cheng T, Wang J (2012) The genome of *Prunus mume*. *Nat Commun* 3:1318

29  
30 **Figure legends**

31 **Figure 1** Synteny of the two haplotype pseudomolecule sequences of the Somei-Yoshino  
32 genome

33 *X*- and *Y*-axis are sequences of CYE\_r3.1spachiana (SPA1 to 8) and CYE\_r3.1speciosa (SPE1  
34 to 8), respectively.

35 **Figure 2** Phylogenetic tree indicating the divergence time of Somei-Yoshino

1 The two genomes of Somei-Yoshino are indicated by SPA and SPE, representing *C. spachiana*  
2 and *C. speciosa*, respectively. Divergence times (MYA; million years ago) between branches  
3 are shown.

4 **Figure 3** Heat map representing expression patterns of dormancy and flowering genes in  
5 Somei-Yoshino buds

6 Colors in each block represent a continuum of gene expression levels with Z-score-  
7 transformed FPKM (low-to-high gene expression levels are represented by blue to red). May  
8 to Apr are the months and 34DBA to 2DBA are days before anthesis when bud samples were  
9 collected. Gene modules based on WGCNA (see also Supplementary Figure S8) are shown as  
10 colored bars between the dendrogram and heatmap.

11 **Figure 4** A putative regulation model for dormancy release and flowering with expression  
12 patterns of related genes in Somei-Yoshino buds

13 The supposed regulation mechanism for dormancy and flowering is based on recent studies  
14 and reviews in woody plants (Falavigna et al. 2019; Lloret et al. 2018; Singh et al. 2018). The  
15 gene expression patterns represented as black arrows are based on Figure 3.

16



1 **Table 1** Assembly statistics of the final version of the Somei-Yoshino genome sequence

|                            | CYE_r3.1 (Total) | CYEspachiana_r3.1 | CYEspectiosa_r3.1 |
|----------------------------|------------------|-------------------|-------------------|
| Number of contigs          | 4,571            | 2,292             | 2,279             |
| Total length (bases)       | 690,105,700      | 350,135,227       | 339,970,473       |
| Contig N50 (bases)         | 918,183          | 1,151,237         | 800,562           |
| Longest contig (bases)     | 11,102,098       | 11,102,098        | 6,718,036         |
| Gap length (bases)         | 0                | 0                 | 0                 |
| GC (%)                     | 37.9             | 37.8              | 38.1              |
| Number of predicted genes  | 95,076           | 48,280            | 46,796            |
| Mean size of genes (bases) | 966              | 975               | 951               |

2

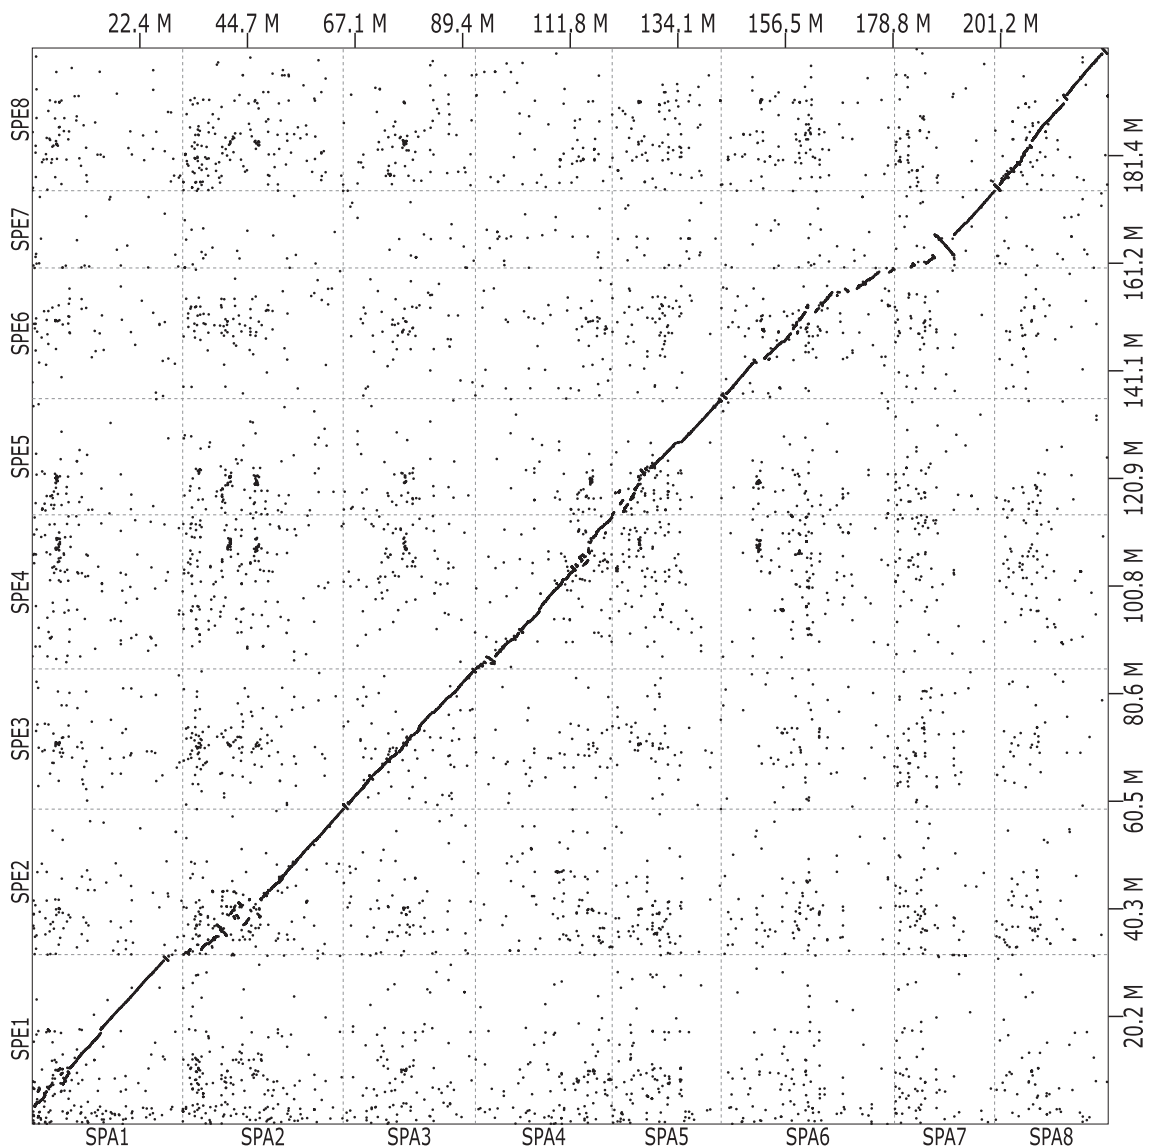

1  
2 **Figure 1** Synteny of the two haplotype pseudomolecule sequences of the Somei-Yoshino  
3 genome  
4 X- and Y-axis are sequences of CYE\_r3.1spachiana (SPA1 to 8) and CYE\_r3.1speciosa  
5 (SPE1 to 8), respectively.  
6

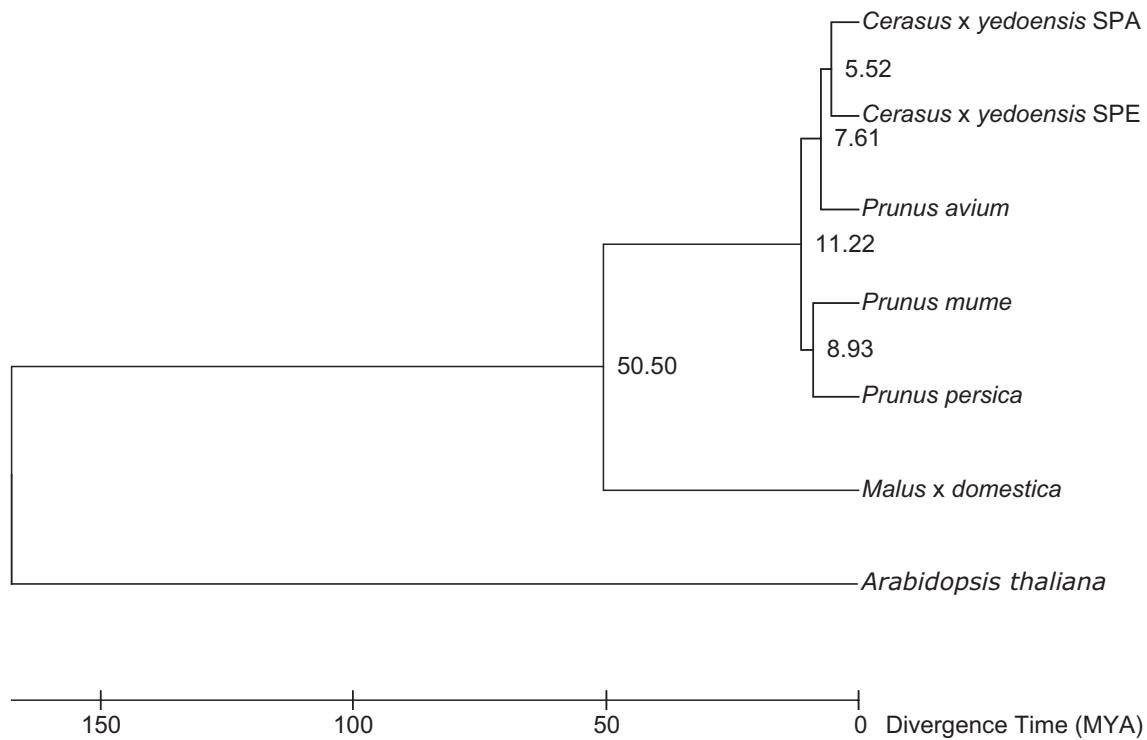

2 **Figure 2** Phylogenetic tree indicating the divergence time of Somei-Yoshino  
3 The two genomes of Somei-Yoshino are indicated by SPA and SPE, representing *C. spachiana*  
4 and *C. speciosa*, respectively. Divergence times (MYA; million years ago) between branches  
5 are shown.  
6

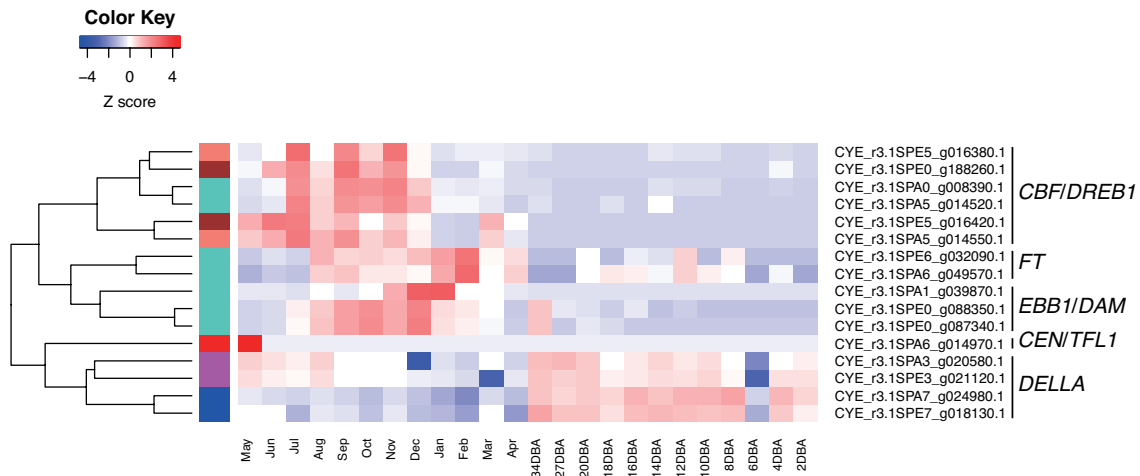

1

2 **Figure 3** Heat map representing expression patterns of dormancy and flowering genes in

3 Somei-Yoshino buds

4 Colors in each block represent a continuum of gene expression levels with Z-score-

5 transformed FPKM (low-to-high gene expression levels are represented by blue to red). May

6 to Apr are the months and 34DBA to 2DBA are days before anthesis when bud samples were

7 collected. Gene modules based on WGCNA (see also Supplementary Figure S8) are shown as

8 colored bars between the dendrogram and heatmap.

9

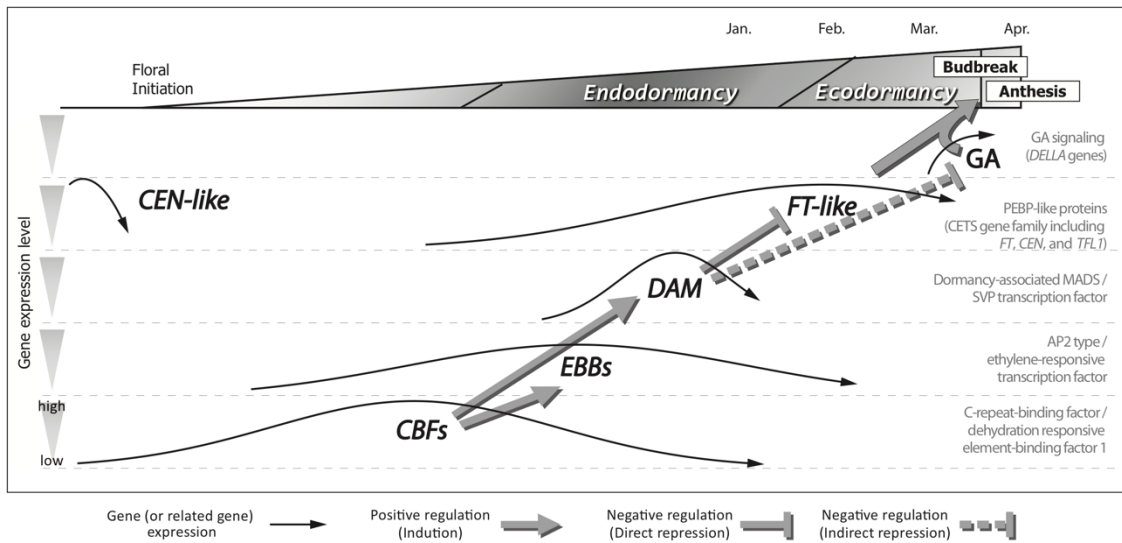

**Figure 4** A putative regulation model for dormancy release and flowering with expression patterns of related genes in Somei-Yoshino buds  
The supposed regulation mechanism for dormancy and flowering is based on recent studies and reviews in woody plants (Falavigna et al. 2019; Lloret et al. 2018; Singh et al. 2018). The gene expression patterns represented as black arrows are based on Figure 3.
